# Supplementary material
Source: PubMed Central journal article supplement (PMC4944659)
Supplement: mmc2.pdf [file mmc2.pdf]

# Macromolecular Crowding Modulates Actomyosin Kinetics

Jinghua Ge,<sup>1,2</sup> Sherry D. Bouriyaphone,<sup>1</sup> Tamara A. Serebrennikova,<sup>3</sup> Andrei V. Astashkin,<sup>4</sup> and Yuri E. Nesmelov<sup>1,2,\*</sup>

<sup>1</sup>Department of Physics and Optical Science and <sup>2</sup>Center for Biomedical Engineering and Science, University of North Carolina, Charlotte, North Carolina; <sup>3</sup>Department of General Physics, Kazan State Power Engineering University, Kazan, Russia; and <sup>4</sup>Department of Chemistry and Biochemistry, University of Arizona, Tucson, Arizona

**ABSTRACT** Actomyosin kinetics is usually studied in dilute solutions, which do not reflect conditions in the cytoplasm. In cells, myosin and actin work in a dense macromolecular environment. High concentrations of macromolecules dramatically reduce the amount of free space available for all solutes, which results in an effective increase of the solutes' chemical potential and protein stabilization. Moreover, in a crowded solution, the chemical potential depends on the size of the solute, with larger molecules experiencing a larger excluded volume than smaller ones. Therefore, since myosin interacts with two ligands of different sizes (actin and ATP), macromolecular crowding can modulate the kinetics of individual steps of the actomyosin ATPase cycle. To emulate the effect of crowding in cells, we studied actomyosin cycle reactions in the presence of a high-molecular-weight polymer, Ficoll70. We observed an increase in the maximum velocity of the actomyosin ATPase cycle, and our transient-kinetics experiments showed that virtually all individual steps of the actomyosin cycle were affected by the addition of Ficoll70. The observed effects of macromolecular crowding on the myosin-ligand interaction cannot be explained by the increase of a solute's chemical potential. A time-resolved Förster resonance energy transfer experiment confirmed that the myosin head assumes a more compact conformation in the presence of Ficoll70 than in a dilute solution. We conclude that the crowding-induced myosin conformational change plays a major role in the changed kinetics of actomyosin ATPase.

## INTRODUCTION

Myosin is a molecular motor that is responsible for force production in muscle, as well as cell trafficking and locomotion, and members of the myosin family participate in a wide range of cellular functions (1). The performance of muscle and the mechanism of the actin-myosin motor function in cells are explained in terms of the kinetics of individual steps of the actomyosin cycle (2). The cycle kinetics is usually studied in dilute solutions at low protein concentrations or in a single-molecule setup, which is dramatically different from the highly structured protein organization of the sarcomere or the dense cytoplasm environment with macromolecular content reaching 20–30% w/v. Such a high macromolecular concentration results in significant volume exclusion (3,4). Due to the excluded volume, the space available to solutes decreases, which 1) forces the macromolecular solutes to accept a more compact form to minimize their excluded volume

(5), and 2) effectively increases the solutes' concentration, thus increasing their chemical potential. The chemical potential of small solutes is less affected by crowding than that of the large ones, since the excluded volume depends on the sum of radii of the solute and the macromolecular crowder. In the actomyosin cycle, myosin interacts with two ligands: a relatively small nucleotide and a much larger actin. Therefore, the actomyosin cycle potentially can be modulated by crowding, and one can expect different effects of crowding on the activity of myosin ligands.

Our goal in this work was to examine whether macromolecular crowding indeed affects the kinetics of the actomyosin cycle. We used buffered solutions of *Dictyostelium discoideum* myosin II, rabbit skeletal actin, ATP, ADP, and 25% w/v Ficoll PM 70 (Ficoll70) as a crowding agent to mimic the crowding effect of the intracellular environment (6–9). Ficoll70 is a nonionic cosolvent with a molecular radius of 5.1 nm and a molecular mass of 70 kDa, and thus is comparable in size and mass to myosin head (89 kDa, prolate spheroid with axes 10.05 nm and 16.25 nm (10)). Ficoll70 stabilizes proteins in solution,

Submitted December 10, 2015, and accepted for publication May 19, 2016.

\*Correspondence: [yuri.nesmelov@unc.edu](mailto:yuri.nesmelov@unc.edu)

Editor: James Sellers.

<http://dx.doi.org/10.1016/j.bpj.2016.05.035>

© 2016 Biophysical Society.

but does not form a stable complex with them (8). For the crowded solution, we anticipated 1) a slight increase in the rate of nucleotide binding to myosin and actomyosin, 2) a significant increase in the strong actomyosin complex formation rate, 3) a slight inhibition of ADP dissociation from actomyosin due to the increased effective concentration of ADP in solution, 4) no effect on the rates of actomyosin dissociation and the recovery stroke, and 5) no change in the overall rate of the cycle. A faster entry into strong actomyosin binding and a slower exit from it should affect the myosin duty ratio, which is determined as the time myosin spends being strongly bound to actin relative to the overall time of the cycle.

As a result of detailed kinetic studies, we found that the effect of Ficoll70 on myosin cannot be explained by changes in the ligand chemical potential. The increased viscosity of the crowded solution leads to diffusion control over the myosin-ligand interaction. A transient time-resolved Förster resonance energy transfer (TR<sup>2</sup>FRET) experiment detected a structural change within the myosin head in the presence of Ficoll70. This structural change could lead to the observed changes in the actomyosin kinetics.

## MATERIALS AND METHODS

### Reagents

We obtained 5-(((2-iodoacetyl)amino)ethyl)aminonaphthalene-1-sulfonic acid (IAEDANS) and *N*-(1-pyrene)iodoacetamide (pyrene) from Life Technologies (Grand Island, NY), DABCYL (4-((4-(dimethylamino)phenyl)azo)benzoic acid) C2 maleimide from AnaSpec (Fremont, CA), and phalloidin, ATP, and ADP from Sigma-Aldrich (Milwaukee, WI). All other chemicals were obtained from ThermoFisher Scientific (Waltham, MA) and VWR (Radnor, PA).

### Protein preparation

An A639C:K498C mutant of *D. discoideum* myosin S1 was expressed and purified as described previously (11,12). The myosin concentration was determined spectrophotometrically assuming an extinction coefficient of  $\epsilon_{280\text{nm}} = 0.69 \text{ (mg/mL)}^{-1}\text{cm}^{-1}$  (13). For FRET measurements, the protein was labeled in two steps: 1) with the donor (IAEDANS) and 2) with the acceptor (DABCYL) (12,14). Unreacted probes were removed by spin concentration (Amicon Ultra; EMD Millipore, Billerica, MA). Labeled myosin was centrifuged at 100,000 *g* for 40 min to remove possible aggregates. The concentration of labeled myosin was determined by a Bradford assay (Bio-Rad Laboratories, Hercules, CA). The experimental buffer contained 20 mM 3-[*N*-morpholino]propanesulfonic acid (MOPS) pH 7.5, 50 mM KCl, and 3 mM MgCl<sub>2</sub>. Actin was prepared from rabbit back and leg muscles as described previously (15). F-actin was labeled with pyrene iodoacetamide or TEMPO maleimide (6:1 label/actin molar ratio), cleaned from the excess label, repolymerized, stabilized with phalloidin at a molar ratio of 1:1, and dialyzed for 2 days at  $T = 4^\circ\text{C}$  against the experimental buffer. The concentration of unlabeled G-actin was determined spectrophotometrically assuming an extinction coefficient of  $\epsilon_{290\text{nm}} = 0.63 \text{ (mg/mL)}^{-1}\text{cm}^{-1}$  (16). The concentration of labeled G-actin and the labeling efficiency were determined spectroscopically using the following expressions:  $[\text{G-actin}] = (A_{290\text{nm}} - (A_{344\text{nm}} \times 0.127))/26,600 \text{ M}^{-1}$  and  $[\text{pyrene}] = A_{344\text{nm}}/22,000 \text{ M}^{-1}$  (17).

### Ficoll70 preparation

A 40% w/v Ficoll PM 70 (Amersham Biosciences AB, Uppsala, Sweden) stock solution was prepared first. The Ficoll70 stock solution was diluted to 25% w/v by addition of myosin or actin-buffered solution, or experimental buffer.

### ATPase assays

Steady-state basal and actin-activated myosin ATPase activities were measured spectrophotometrically at  $T = 20^\circ\text{C}$  in the experimental buffer with and without 25% w/v Ficoll70 by the liberation of inorganic phosphate as described previously (18). Both myosin and F-actin were carefully washed before each experiment to avoid any possibility of contamination by products of hydrolysis (phosphate and ADP). Myosin or actomyosin was mixed with ATP, and aliquots were collected at equal time intervals and analyzed for phosphate in an ammonium molybdate-malachite green colorimetric assay (see [Supporting Materials and Methods](#) for more details). The rate of basal myosin ATPase was determined as the rate of phosphate production. To determine the maximum velocity of the actomyosin ATPase, the rates of myosin ATPase at different actin concentrations were fitted by the hyperbolic equation  $v = V_{\text{max}}[\text{actin}]/(K_d + [\text{actin}])$ , where  $v$  is the rate of the ATPase in the presence of actin, and  $V_{\text{max}}$  is the rate of myosin ATPase at an infinite actin concentration (the horizontal asymptote of the hyperbola). We did not account for F-actin ATPase activity because this is a slow process (19) that is significantly inhibited by phalloidin (20). The determined basal and actin-activated myosin ATPase rates were comparable to those reported for other *D. discoideum* myosin constructs (21–25).

The transient intrinsic fluorescence of myosin and the fluorescence of pyrene actin were measured with a Bio-Logic SFM-300 stopped-flow transient fluorimeter (Bio-Logic Science Instruments SAS, Claix, France) equipped with an FC-15 cuvette. The mixing unit dead time was 2.6 ms. All experiments were done at  $T = 20^\circ\text{C}$ . Usually, three syringes and two mixers were used in an experiment. Continuous flow and the smallest intermixer delay line (40  $\mu\text{L}$ ) were used except in the weak-to-strong-binding transition experiment, in which intermittent flow and a 60  $\mu\text{L}$  delay line were used. The delay time of the weak-to-strong binding transition experiments was adjusted to make sure that the maximum concentration of myosin in the M\*\* state would be produced in the first mixing (Fig. S8). Myosin intrinsic fluorescence was excited by a mercury-xenon lamp at 296 nm and detected using a 320 nm cutoff filter. The pyrene fluorescence was excited at 365 nm and detected using a 420 nm cutoff filter. Multiple transients were usually acquired and averaged to improve the signal/noise ratio. A total of 8000 points were acquired in each experiment.

### Analysis of fluorescence transients

The transients obtained in each experiment were fitted globally by the single exponential function  $S(t) = S_0 + A \times \exp(-k_{\text{obs}} \times t)$ , where  $S(t)$  is the observed signal at time  $t$ ,  $A$  is the signal amplitude, and  $k_{\text{obs}}$  is the observed rate constant. The dependence of the observed rates on the nucleotide or protein concentration was fitted by a hyperbola,  $v = V_{\text{max}}[\text{ATP}]/(K_d + [\text{ATP}])$ , allowing the determination of the maximum rate,  $V_{\text{max}}$  (the horizontal asymptote of the hyperbola). To determine the bimolecular rate, the dependence of the observed rates on the nucleotide or protein concentration was fitted by a straight line at small concentrations of the nucleotide or protein. Competitive inhibition of ATP-induced actomyosin dissociation by ADP was measured with pyrene-labeled actin complexed with myosin and incubated with ADP at various concentrations. This solution was rapidly mixed with ATP and the transient fluorescence of pyrene-actin dissociated from myosin was measured. Transients were fitted by single-exponential functions. The observed reaction rates were fitted by the

equation  $k_{\text{obs}}/k_0 = 1/(1 + [\text{ADP}]/K'_5)$  (26–28), assuming a small [ATP], using the  $k_0$  determined in the experiment without ADP, and varying  $K'_5$ , which is the constant of ADP dissociation from actomyosin upon chasing with ATP (see Fig. 2). All data fits were performed with Origin 8 (OriginLab, Northampton, MA). Ficoll70 was fluorescent in the spectral range of our experiments, and its fluorescence exhibited photobleaching (Fig. S9). The transient fluorescence of the Ficoll70-buffered solution was measured before each experiment. The observed transient was fitted with a polynomial function, which was then subtracted from the transients obtained in other experiments.

TR<sup>2</sup>FRET was measured with an in-house-built transient fluorimeter (14) equipped with an SX-18 stopped-flow unit (Applied Photophysics, Leatherhead, UK), passively Q-switched microchip YAG laser (SNV-20F-100, 355 nm, 20 kHz; Teem Photonics, Meylan, France), photomultiplier (H6779-20; Hamamatsu, Middlesex, NJ), and fast digitizer (Acqiris DC252; Agilent, Santa Clara, CA). A 420 nm cutoff filter and a polarizer set at the magic angle were used in the detection arm. The dead time of the mixing unit was 2.4 ms. All experiments were done at  $T = 20^\circ\text{C}$ . FRET pair-labeled myosin was rapidly mixed with ATP solution, and the donor fluorescence waveform was acquired after each laser pulse with picosecond resolution. Multiple traces were acquired and averaged to increase the signal/noise ratio. Before each experiment, the fluorescence transients of the Ficoll70-buffered solution were measured. All transients acquired in the experiment were corrected for Ficoll70 fluorescence to account for Ficoll70 photobleaching. The analysis of the donor lifetime in terms of the interprobe distance and myosin structural conformations M\* and M\*\* (pre- and postrecovery stroke states, respectively) is described in the Supporting Materials and Methods.

## RESULTS

### Increased rate of actin-activated myosin ATPase in the crowded environment

The maximum velocity of steady-state, actin-activated myosin ATPase increased by 30% in the Ficoll70 solution (Fig. 1 A; Table 1). The steady-state myosin ATPase activity was determined at the saturated substrate level, and the velocity of the reaction was described by zero-order kinetics independently of the substrate concentration and the volume excluded by Ficoll70. Addition of Ficoll70 did not affect the rate of basal myosin ATPase activity (Fig. 1 B). Therefore, the actin activation, determined as the ratio of the rates of the actin-activated to the basal myosin ATPase activity, increased from 18-fold without Ficoll70 to 23-fold in the crowded environment.

### Ficoll70 affects ATP-induced actomyosin dissociation

The rate of ATP-induced actomyosin dissociation was measured with 0.5  $\mu\text{M}$  pyrene actomyosin (the concentration in the final mixture, here and throughout the text)

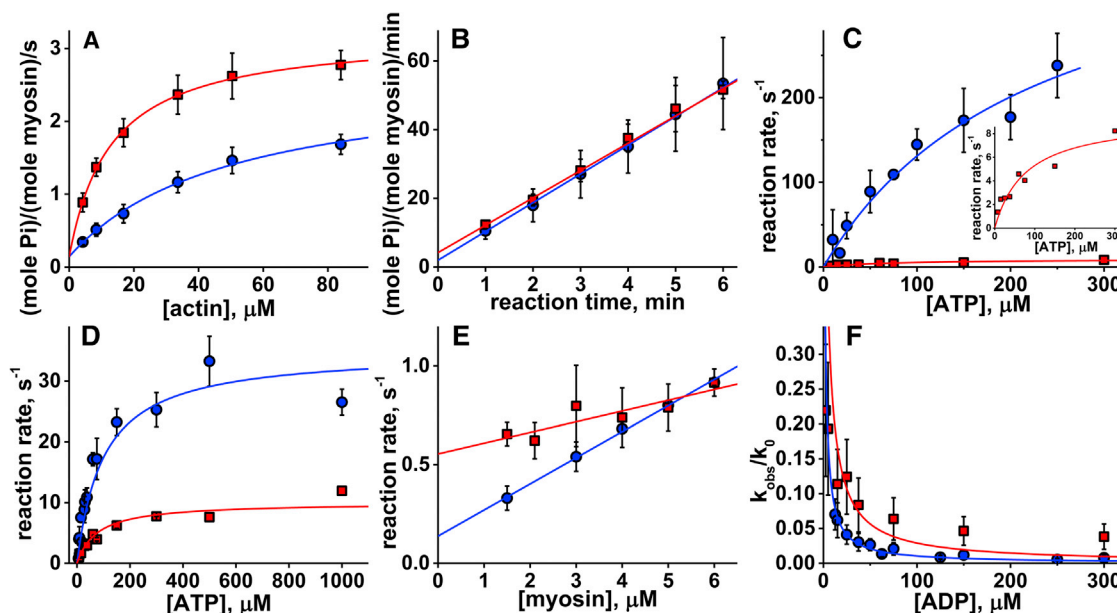

FIGURE 1 (A) Steady-state, actin-activated myosin ATPase activity ( $[\text{myosin}] = 0.8 \mu\text{M}$ ,  $[\text{ATP}] = 5 \text{ mM}$ ; *circles*, no Ficoll70; *squares*, with Ficoll70 in solution). Fit with a hyperbola,  $V_{\text{max}} = 2.5 \pm 0.1 \text{ s}^{-1}$ , no Ficoll70; and  $3.1 \pm 0.1 \text{ s}^{-1}$  with Ficoll70. The data points are averages of  $N = 6$  independent protein preparations. Uncertainties are the standard deviation here and throughout the text. (B) Basal myosin ATPase activity,  $[\text{myosin}] = 3.3 \mu\text{M}$ . Linear fit,  $N = 6$ ,  $v = 0.140 \pm 0.007 \text{ s}^{-1}$ , no Ficoll70, and  $0.133 \pm 0.002 \text{ s}^{-1}$  with Ficoll70. (C) ATP-induced actomyosin dissociation. No Ficoll70,  $N = 6$ ; with Ficoll70 in solution,  $N = 2$ . Fit with a hyperbola,  $V_{\text{max}} = 431.6 \pm 120.1 \text{ s}^{-1}$ , no Ficoll70; and  $9.4 \pm 1.4 \text{ s}^{-1}$  with Ficoll70. Inset: data obtained with Ficoll70 in solution. (D) Kinetics of ATP binding and the recovery stroke upon rapid mixing of myosin and ATP; the observed rate constants are fitted with a hyperbola,  $V_{\text{max}} = 34.9 \pm 4.4 \text{ s}^{-1}$ ,  $N = 4$ , no Ficoll70; and  $10.0 \pm 0.9 \text{ s}^{-1}$ ,  $N = 2$ , with Ficoll70 in solution. (E) Kinetics of the weak-to-strong actomyosin binding transition,  $N = 4$ . The observed reaction rates are fitted by a straight line, and the second-order reaction rate constant is determined from the slope of the line.  $K_8 k'_{+4} = 0.13 \pm 0.01 \mu\text{M}^{-1} \text{ s}^{-1}$ , no Ficoll70; and  $0.05 \pm 0.01 \mu\text{M}^{-1} \text{ s}^{-1}$  with Ficoll70 in solution. (F) ATP-induced ADP dissociation from actomyosin ( $[\text{actomyosin}] = 0.5 \mu\text{M}$ ,  $[\text{ATP}] = 25 \mu\text{M}$ ; *circles*, no Ficoll70,  $N = 3$ ; *squares*, with Ficoll70,  $N = 2$ ). Lines: fit by the model of competitive inhibition with variable parameter  $K'_5$ ,  $K'_5 = 1.07 \pm 0.07 \mu\text{M}$ , no Ficoll70; and  $1.58 \pm 0.58 \mu\text{M}$  with Ficoll70. To see this figure in color, go online.

**TABLE 1 Actomyosin Kinetic Rate Constants with and without Ficoll70**

| Kinetic Step                                                                       | No Ficoll70       | With Ficoll70     |
|------------------------------------------------------------------------------------|-------------------|-------------------|
| Actomyosin dissociation,<br>$K'_1 k'_{+2}, \mu\text{M}^{-1}\text{s}^{-1}$          | $1.247 \pm 0.177$ | $0.094 \pm 0.089$ |
| Actomyosin dissociation,<br>$V_{\text{max}}, \text{s}^{-1}$                        | $431.6 \pm 120.1$ | $9.4 \pm 1.4$     |
| ATP binding to myosin,<br>$K_1 k_{+2}, \mu\text{M}^{-1}\text{s}^{-1}$              | $0.26 \pm 0.05$   | $0.11 \pm 0.01$   |
| Recovery stroke and hydrolysis,<br>$V_{\text{max}}, \text{s}^{-1}$                 | $34.9 \pm 4.4$    | $10.0 \pm 0.9$    |
| Weak-to-strong-binding transition,<br>$K_8 k'_{+4}, \mu\text{M}^{-1}\text{s}^{-1}$ | $0.13 \pm 0.01$   | $0.05 \pm 0.01$   |
| ADP release from actomyosin,<br>$K'_5, \mu\text{M}$                                | $1.07 \pm 0.07$   | $1.58 \pm 0.58$   |
| Basal myosin ATPase, (mole Pi)/<br>(mole myosin)/s                                 | $0.140 \pm 0.007$ | $0.133 \pm 0.002$ |
| Actin-activated myosin ATPase,<br>$V_{\text{max}},$<br>(mole Pi)/(mole myosin)/s   | $2.5 \pm 0.1$     | $3.1 \pm 0.1$     |
| Actin activation, actin-activated/<br>basal ATPase                                 | $17.9 \pm 1.1$    | $23.3 \pm 0.8$    |

rapidly mixed with various concentrations of ATP (steps 1 and 2, Fig. 2). Actomyosin dissociation was monitored via an increase of pyrene fluorescence and fitted by a single exponential function (Fig. S1 A). The obtained dependence of the reaction rates on the ATP concentration was fitted with a hyperbola (the maximum rate of actomyosin dissociation  $V_{\text{max}}$  is a horizontal asymptote determined in the fit; Fig. 1 C).  $V_{\text{max}}$  decreased 45-fold upon addition of Ficoll70 to the solution (Table 1). The second-order reaction rate constant was determined from the slope of the straight line, fitted to the data points at low [ATP]. Without Ficoll70 in solution, the second-order rate constant was in excellent agreement with the corresponding rates obtained for other *D. discoideum* constructs (29,30). With Ficoll70 in solution, the second-order rate constant decreased 12-fold (Table 1).

### The hydrolysis rate is affected by Ficoll70

The rate of the recovery stroke and hydrolysis was measured by rapidly mixing 0.5  $\mu\text{M}$  myosin and ATP (12.5–300  $\mu\text{M}$ )

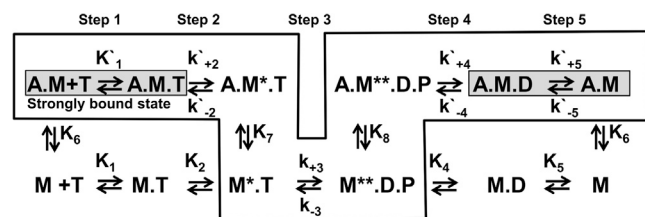

FIGURE 2 Actomyosin ATPase cycle reaction scheme. A, actin; M, myosin (M\* and M\*\* indicate myosin states with increased intrinsic fluorescence); T, ATP; D, ADP; P, phosphate. The asterisk indicates reaction rate constants that describe actomyosin kinetics. Highlighted: the strongly bound actomyosin state. Boxed: the generally accepted pathway of actomyosin interaction.

and monitoring the increase in myosin intrinsic fluorescence (14) (step 3, Fig. 2). The observed intrinsic fluorescence transients were fitted with single-exponential functions (Fig. S1 B), and the dependence of the obtained reaction rates on [ATP] was fitted by the hyperbolic equation (Figs. 1 D and 2). The maximum rate of myosin fluorescence intensity change ( $V_{\text{max}}$ ) measures the rate of ATP hydrolysis,  $k_{+3} + k_{-3}$  (31,32), assuming that step 3 consists of two distinct but coupled substeps: the fast and reversible recovery stroke (step 3a) and the hydrolysis step (step 3b), which drives the reaction forward (33). Therefore, the kinetics of the hydrolysis step decreased 3.5-fold in the presence of Ficoll70 (Table 1). Both with and without Ficoll70,  $V_{\text{max}}$  was fast enough to be nonlimiting for the overall rate of the actomyosin cycle. The association rate constant,  $K_1 k_{+2}$ , determined from the initial slope, decreased 2.4-fold in the presence of Ficoll70.

### Ficoll70 decreases the rate of the actomyosin weak-to-strong-binding transition

The rate of the weak-to-strong-binding transition,  $K_8 k'_{+4}$ , was measured in the double-mixing experiment (step 4, Fig. 2). Initially, myosin at various concentrations was rapidly mixed with 100  $\mu\text{M}$  ATP and the reaction was aged in the delay loop for 2 s to populate myosin in the postrecovery state. After the delay, 0.3  $\mu\text{M}$  pyrene actin with 1 mM ADP was rapidly added to the myosin. Pyrene actin fluorescence is sensitive to strong actomyosin binding (34), and we monitored the formation of a strong actomyosin bond via a decrease in pyrene fluorescence. 1 mM ADP was added to quench the reaction. The observed pyrene fluorescence transients were fitted with single-exponential functions (Fig. S1 C). The obtained dependence of reaction rate constants on the myosin concentration was fitted by a straight line (Fig. 1 E). The rate of the weak-to-strong-binding transition was determined from the slope of the line and was found to be 2.5-fold smaller in the presence of Ficoll70 than in the noncrowded solution.

### ADP dissociation from actomyosin

To measure the ADP dissociation constant,  $K'_5$ , we first pre-mixed 0.5  $\mu\text{M}$  pyrene-labeled actomyosin with various amounts of ADP and then rapidly mixed the solution with ATP (step 5, Fig. 2). ADP dissociation was monitored via an increase in pyrene fluorescence due to actomyosin dissociation after the dissociation of ADP and ATP binding. ADP dissociation is a slow process compared with ATP-induced actomyosin dissociation (Fig. S1 A), and therefore the rate measured in an experiment is determined by the kinetics of ADP dissociation. The observed transients of pyrene fluorescence were fitted with single-exponential functions. The obtained dependencies of the reaction rates of actomyosin dissociation on [ADP] were fitted using the model of

competitive inhibition (28) (Fig. 1 F). We found that  $K'_5$  was the same with and without Ficoll70 (Table 1). The high affinity of ADP for our myosin construct is in good agreement with the literature data for *D. discoideum* myosin (29).

### The structure of myosin head is affected by macromolecular crowding

We used TR<sup>2</sup>FRET (11,12) to measure the distance between two FRET probes attached to myosin and thus determine the effect of macromolecular crowding on the protein structure. The donor and acceptor probes were attached to K498C (the force-generating region) and A639C (the lower 50 kDa domain) within the myosin head (Fig. 3), and the interprobe distance in the pre- and postrecovery structural states (M, M\*, and M\*\*; Fig. 2) was measured in a transient kinetics experiment (14). We mixed myosin (M, 10  $\mu$ M) with the buffer to measure the interprobe distance in the M state, and detected a 0.8 nm interprobe distance reduction in the presence of Ficoll70 (Fig. 3). We mixed myosin with 300  $\mu$ M ATP to monitor the formation of the M\*\* state via an increased FRET effect. The interprobe distance and Ficoll70-induced distance change of the M\* state were similar to those of the M state. We found a 0.6 nm interprobe distance reduction in the M\*\* structural state in the presence of Ficoll70 (Fig. 3). The kinetics of the M\*\* state formation determined with the FRET pair was the same as the kinetics of the myosin intrinsic fluorescence change. We conclude that the myosin head assumes a more compact form in a crowded solution than in a dilute solution to minimize its excluded volume according to Le Chatelier's principle. The observed decrease of the ligands' affinity for myosin in the crowded solution leads us to suggest that the structural change affects the structure or dynamics of the corresponding ligand-binding sites.

## DISCUSSION

According to the excluded-volume theory (4), the rate of the myosin reaction with the ligands actin and ATP is expected to increase in a crowded solution due to the increase in the chemical potential of the solutes. However, we did not

observe such a rate increase in our experiments. The observed decrease in the rates of actomyosin and myosin-nucleotide association indicates that other factors affect the myosin-ligand interaction in a crowded solution. Such factors could include the increased ionic strength of the solution, osmotic pressure, viscosity, and structural changes of myosin head or actin induced by macromolecular crowding.

Literature data (35) and our experiments (Supporting Materials and Methods) show that the increased ionic strength decreases the rate of actomyosin association. For our *D. discoideum* myosin construct, we found that the rate decrease was two times smaller than the effect of macromolecular crowding (Supporting Materials and Methods). Therefore, the effect of increased ionic strength is not dominant when actomyosin is in crowded conditions. The crowding increases the osmotic pressure, which in turn decreases the rate of the rigor complex formation (for example, in a 30% w/v sucrose solution, the rate decreases fivefold due to an increase in osmotic pressure (36)), but the osmotic pressure produced by 25% w/v Ficoll70 is  $\sim 20$  times lower than that of the 30% w/v sucrose solution (7), making the effect of the osmotic pressure negligible. Previously, myosin kinetics experiments were performed in the presence of polyethylene glycol (PEG) of different sizes (37–39). One has to distinguish between a globular crowder (Ficoll) and a polymer (PEG), which forms loose mesh in solution (40). PEG affects osmotic pressure, changing the hydration of solutes, and therefore the effects of PEG and Ficoll70 on myosin kinetics could not be compared. For example, addition of Ficoll70 does not change myosin basal ATPase activity, but addition of PEG decreases ATPase activity (37,39), as does addition of another known osmolyte, sucrose (36).

The macroscopic viscosity of 25% w/v Ficoll70 solution is  $\eta = 17$  cP (41). Using the Stokes-Einstein relation, we can estimate the coefficient of myosin translational diffusion as  $2.5 \times 10^{-12} \text{ m}^2\text{s}^{-1}$  (assuming for simplicity that the myosin head is a spheroid with a diameter of 10 nm), and that of ATP as  $2.5 \times 10^{-11} \text{ m}^2\text{s}^{-1}$ . The rate of the myosin-ligand binding can be estimated from the Smoluchowski expression, modified with the statistical weights to account for favorable orientations of interacting molecules (42),  $k_{+1} = 4\pi D_{12} R_{12} f_2$  (where  $R_{12} = R_1 + R_2$  is the reaction radius,

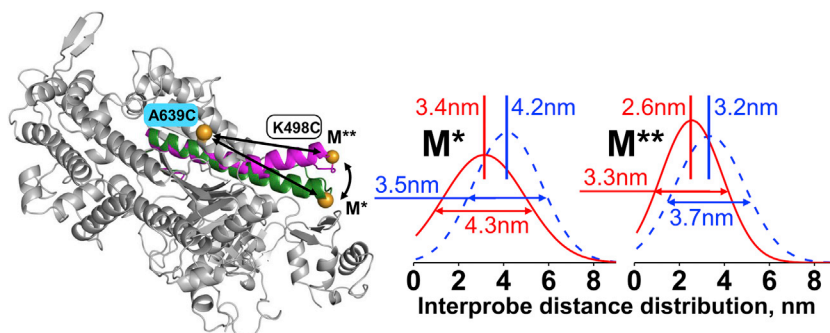

FIGURE 3 (Left) The myosin head, with overlay of crystal structures 1FMV (M\*) and 1VOM (M\*\*), showing a conformational change within the force-generating region. Spheres: engineered labeling sites, showing the predicted shortening of distance between residues 639 and 498 (arrows) during the recovery stroke. (Right) Gaussian distance distributions of the FRET pair within the myosin head (K498C:A639C) without (dashed line) and with (solid line) Ficoll70 in solution. To see this figure in color, go online.

approximately equal to the sum of the molecular radii of myosin and ligand;  $D_{12} = D_1 + D_2$  is the relative coefficient of translational diffusion; and  $f_i = (1/4)\sin^2(\theta_i/2)$ ,  $i = 1, 2$  is the geometric steric factor, reflecting the angular size  $\theta_i$  of the reactive spot of interacting molecules, determined as the ratio of the surfaces of the reactive spot and the whole molecule). For the myosin-ATP interaction, assuming  $f_{\text{ATP}} \sim 0.5$  and  $f_{\text{myosin}} = 2.5 \times 10^{-3}$  (the reactive spot on the myosin surface on the order of the size of ATP),  $k_{+1}^{-\text{F}} = 1.43 \mu\text{M}^{-1}\text{s}^{-1}$  without Ficoll70, and  $k_{+1}^{+\text{F}} = 0.08 \mu\text{M}^{-1}\text{s}^{-1}$  with Ficoll70. The estimated  $k_{+1}^{-\text{F}}$  is an order of magnitude larger than the observed rate constant  $K_1k_{+2}$  (Table 1); therefore, the solvent viscosity does not affect the reaction. With Ficoll70, the estimated  $k_{+1}^{+\text{F}}$  is close to the experimental rate constant, indicating that the solvent viscosity may affect the reaction rate. Interestingly, the obtained values of  $K_1k_{+2}$  for the actomyosin-ATP interaction with and without Ficoll70 are close to the calculated values of  $k'_{+1}$  ( $1.25 \mu\text{M}^{-1}\text{s}^{-1}$  and  $1.43 \mu\text{M}^{-1}\text{s}^{-1}$  without Ficoll70, and  $0.09 \mu\text{M}^{-1}\text{s}^{-1}$  and  $0.08 \mu\text{M}^{-1}\text{s}^{-1}$  with Ficoll70), indicating that the ATP binding to actomyosin may be a diffusion-controlled step. For the actomyosin interaction, assuming  $f_{\text{actin}} = 0.27$  and  $f_{\text{myosin}} = 0.05$  (taking the actin filament as a cylinder with a diameter of 8.4 nm, and the actomyosin interacting spot to have a 2.3 nm radius (43),  $f_{\text{actin}} = (1/2)\sin(\theta/2)$ , where  $\theta$  is the angular size of the interaction spot measured from the axis of the cylinder, and a slow diffusion of actin filament,  $D_{\text{actin}} \ll D_{\text{myosin}}$ , one can estimate  $k_{+1}^{-\text{F}} = 2.5 \mu\text{M}^{-1}\text{s}^{-1}$  without Ficoll70 and  $k_{+1}^{+\text{F}} = 0.15 \mu\text{M}^{-1}\text{s}^{-1}$  with Ficoll70. The obtained rate of the actomyosin weak-to-strong binding transition without Ficoll70 is an order of magnitude slower than the calculated diffusion-limited rate, and with Ficoll70 the obtained rate is just three times less than the calculated diffusion-limiting rate, indicating that in the crowded environment the interaction of actin and myosin may be diffusion controlled. Our electron paramagnetic resonance experiments (see Supporting Materials and Methods) show that actin structure is not affected by Ficoll70 in solution, but the TR<sup>2</sup>FRET experiment shows that the myosin head adopts a more compact structural state compared with that in a dilute solution. It is possible that the structural change in the myosin head affects the kinetics of the actomyosin cycle and therefore may change the duty ratio of myosin molecular motor.

## CONCLUSION

Macromolecular crowding modulates the actomyosin interaction in solution. The overall rate of the actomyosin cycle increases in a crowded solution. The myosin head adopts a more compact conformation than it does in a dilute solution to minimize the excluded volume. Crowding-induced increase of solution viscosity modulates the interaction of the solutes, and the observed decrease in the reaction rates of the myosin-actin and myosin-ATP interactions agrees

well with the calculated values of the diffusion-controlled reaction rates.

## SUPPORTING MATERIAL

Supporting Materials and Methods and nine figures are available at [http://www.biophysj.org/biophysj/supplemental/S0006-3495\(16\)30360-5](http://www.biophysj.org/biophysj/supplemental/S0006-3495(16)30360-5).

## AUTHOR CONTRIBUTIONS

Y.E.N., T.A.S., and J.G. designed research; J.G., S.D.B., and A.V.A. performed research; Y.E.N., T.A.S., and A.V.A. contributed analytic tools; Y.E.N., J.G., and S.D.B. analyzed data; and Y.E.N., T.A.S., J.G., and A.V.A. wrote the manuscript.

## ACKNOWLEDGMENTS

We thank the anonymous reviewers for critical reviews of an earlier version of the manuscript.

This work was supported by National Institutes of Health grant AR59621 and by funds provided by the University of North Carolina at Charlotte.

## REFERENCES

- Hodge, T., and M. J. T. V. Cope. 2000. A myosin family tree. *J. Cell Sci.* 113:3353–3354.
- Lymn, R. W., and E. W. Taylor. 1971. Mechanism of adenosine triphosphate hydrolysis by actomyosin. *Biochemistry.* 10:4617–4624.
- Ellis, R. J. 2001. Macromolecular crowding: obvious but underappreciated. *Trends Biochem. Sci.* 26:597–604.
- Minton, A. P. 1983. The effect of volume occupancy upon the thermodynamic activity of proteins: some biochemical consequences. *Mol. Cell. Biochem.* 55:119–140.
- Elcock, A. H. 2010. Models of macromolecular crowding effects and the need for quantitative comparisons with experiment. *Curr. Opin. Struct. Biol.* 20:196–206.
- Dhar, A., A. Samiotakis, ..., M. S. Cheung. 2010. Structure, function, and folding of phosphoglycerate kinase are strongly perturbed by macromolecular crowding. *Proc. Natl. Acad. Sci. USA.* 107:17586–17591.
- López, C. J., M. R. Fleissner, ..., W. L. Hubbell. 2009. Osmolyte perturbation reveals conformational equilibria in spin-labeled proteins. *Protein Sci.* 18:1637–1652.
- Wang, Y., M. Sarkar, ..., G. J. Pielak. 2012. Macromolecular crowding and protein stability. *J. Am. Chem. Soc.* 134:16614–16618.
- Wenner, J. R., and V. A. Bloomfield. 1999. Crowding effects on EcoRV kinetics and binding. *Biophys. J.* 77:3234–3241.
- Garrigos, M., J. E. Morel, and J. Garcia de la Torre. 1983. Reinvestigation of the shape and state of hydration of the skeletal myosin subfragment 1 monomer in solution. *Biochemistry.* 22:4961–4969.
- Agafonov, R. V., I. V. Negrashov, ..., Y. E. Nesmelov. 2009. Structural dynamics of the myosin relay helix by time-resolved EPR and FRET. *Proc. Natl. Acad. Sci. USA.* 106:21625–21630.
- Nesmelov, Y. E., R. V. Agafonov, ..., D. D. Thomas. 2011. Structural kinetics of myosin by transient time-resolved FRET. *Proc. Natl. Acad. Sci. USA.* 108:1891–1896.
- Agafonov, R. V., Y. E. Nesmelov, ..., D. D. Thomas. 2008. Muscle and nonmuscle myosins probed by a spin label at equivalent sites in the force-generating domain. *Proc. Natl. Acad. Sci. USA.* 105:13397–13402.

14. Tkachev, Y. V., J. Ge, ..., Y. E. Nesmelov. 2013. Metal cation controls myosin and actomyosin kinetics. *Protein Sci.* 22:1766–1774.
15. Strzelecka-Golaszewska, H., E. Próchniewicz, ..., W. Drabikowski. 1980. Chicken-gizzard actin: polymerization and stability. *Eur. J. Biochem.* 104:41–52.
16. Houk, T. W., Jr., and K. Ue. 1974. The measurement of actin concentration in solution: a comparison of methods. *Anal. Biochem.* 62:66–74.
17. Takagi, Y., Y. Yang, ..., M. Kovács. 2008. Human myosin Vc is a low duty ratio, nonprocessive molecular motor. *J. Biol. Chem.* 283:8527–8537.
18. Lanzetta, P. A., L. J. Alvarez, ..., O. A. Candia. 1979. An improved assay for nanomole amounts of inorganic phosphate. *Anal. Biochem.* 100:95–97.
19. Martonosi, A., M. A. Gouvea, and J. Gergerly. 1960. Studies on actin. I. The interaction of C14-labeled adenine nucleotides with actin. *J. Biol. Chem.* 235:1700–1703.
20. Dancker, P., I. Löw, ..., T. Wieland. 1975. Interaction of actin with phalloidin: polymerization and stabilization of F-actin. *Biochim. Biophys. Acta.* 400:407–414.
21. Korman, V. L., S. E. Anderson, ..., D. D. Thomas. 2006. Structural dynamics of the actin-myosin interface by site-directed spectroscopy. *J. Mol. Biol.* 356:1107–1117.
22. Klein, J. C., A. R. Burr, ..., D. D. Thomas. 2008. Actin-binding cleft closure in myosin II probed by site-directed spin labeling and pulsed EPR. *Proc. Natl. Acad. Sci. USA.* 105:12867–12872.
23. Ito, K., T. Q. Uyeda, ..., K. Yamamoto. 2003. Requirement of domain-domain interaction for conformational change and functional ATP hydrolysis in myosin. *J. Biol. Chem.* 278:31049–31057.
24. Bobkov, A. A., K. Sutoh, and E. Reisler. 1997. Nucleotide and actin binding properties of the isolated motor domain from Dictyostelium discoideum myosin. *J. Muscle Res. Cell Motil.* 18:563–571.
25. Gyimesi, M., B. Kintszes, ..., A. Málnási-Csizmadia. 2008. The mechanism of the reverse recovery step, phosphate release, and actin activation of Dictyostelium myosin II. *J. Biol. Chem.* 283:8153–8163.
26. Rosenfeld, S. S., J. Xing, ..., H. L. Sweeney. 2000. Kinetic and spectroscopic evidence for three actomyosin:ADP states in smooth muscle. *J. Biol. Chem.* 275:25418–25426.
27. Deacon, J. C., M. J. Bloemink, ..., L. A. Leinwand. 2012. Erratum to: Identification of functional differences between recombinant human  $\alpha$  and  $\beta$  cardiac myosin motors. *Cell. Mol. Life Sci.* 69:4239–4255.
28. Segel, I. H. 1976. *Biochemical Calculations: How to Solve Mathematical Problems in General Biochemistry*, 2nd ed. Wiley, New York.
29. Kurzawa, S. E., D. J. Manstein, and M. A. Geeves. 1997. Dictyostelium discoideum myosin II: characterization of functional myosin motor fragments. *Biochemistry.* 36:317–323.
30. Woodward, S. K. A., M. A. Geeves, and D. J. Manstein. 1995. Kinetic characterization of the catalytic domain of Dictyostelium discoideum myosin. *Biochemistry.* 34:16056–16064.
31. Ritchie, M. D., M. A. Geeves, ..., D. J. Manstein. 1993. Kinetic characterization of a cytoplasmic myosin motor domain expressed in Dictyostelium discoideum. *Proc. Natl. Acad. Sci. USA.* 90:8619–8623.
32. De La Cruz, E. M., A. L. Wells, ..., H. L. Sweeney. 1999. The kinetic mechanism of myosin V. *Proc. Natl. Acad. Sci. USA.* 96:13726–13731.
33. Málnási-Csizmadia, A., D. S. Pearson, ..., C. R. Bagshaw. 2001. Kinetic resolution of a conformational transition and the ATP hydrolysis step using relaxation methods with a Dictyostelium myosin II mutant containing a single tryptophan residue. *Biochemistry.* 40:12727–12737.
34. De La Cruz, E. M., and E. M. Ostap. 2009. Kinetic and equilibrium analysis of the myosin ATPase. *Methods Enzymol.* 455:157–192.
35. Siemankowski, R. F., and H. D. White. 1984. Kinetics of the interaction between actin, ADP, and cardiac myosin-S1. *J. Biol. Chem.* 259:5045–5053.
36. Jackson, R., Jr., M. Webb, ..., J. E. Baker. 2014. Sucrose increases the activation energy barrier for actin-myosin strong binding. *Arch. Biochem. Biophys.* 552–553:74–82.
37. Grazi, E., O. Cintio, ..., G. Trombetta. 1999. Reversible inactivation of myosin subfragment-1 activity by mechanical immobilization: a reappraisal. *Biophys. J.* 76:3349–3350, author reply 3351.
38. Highsmith, S., K. Duignan, ..., J. Cohen. 1996. Osmotic pressure probe of actin-myosin hydration changes during ATP hydrolysis. *Biophys. J.* 70:2830–2837.
39. Highsmith, S., K. Duignan, ..., R. Cooke. 1998. Reversible inactivation of myosin subfragment 1 activity by mechanical immobilization. *Biophys. J.* 74:1465–1472.
40. Sozański, K., F. Ruhnnow, ..., R. Hołyst. 2015. Small crowders slow down kinesin-1 stepping by hindering motor domain diffusion. *Phys. Rev. Lett.* 115:218102.
41. Onishi, H., S. V. Mikhailenko, and M. F. Morales. 2006. Toward understanding actin activation of myosin ATPase: the role of myosin surface loops. *Proc. Natl. Acad. Sci. USA.* 103:6136–6141.
42. Temkin, S. I., and B. I. Yakobson. 1984. Diffusion-controlled reactions of chemically anisotropic molecules. *J. Phys. Chem.* 88:2679–2682.
43. Behrmann, E., M. Müller, ..., S. Raunser. 2012. Structure of the rigor actin-tropomyosin-myosin complex. *Cell.* 150:327–338.

**Biophysical Journal, Volume 111**

**Supplemental Information**

**Macromolecular Crowding Modulates Actomyosin Kinetics**

**Jinghua Ge, Sherry D. Bouriyaphone, Tamara A. Serebrennikova, Andrei V. Astashkin, and Yuri E. Neshmelov**



# Supporting Information

## Macromolecular crowding modulates actomyosin kinetics

J. Ge, S. D. Bouriyaophone, T. A. Serebrennikova, A. V. Astashkin, Y. E. Nesmelov

### Ficoll70 slows actomyosin rigor binding. Effect of increased ionic strength of the solution.

To measure the rate of the rigor binding, we have rapidly mixed pyrene actin (0.5  $\mu\text{M}$ ) with myosin (various concentrations) and monitored the decrease in pyrene fluorescence associated with the rigor actomyosin complex formation [1]. The observed transients were fitted with single-exponential functions (Figure S1D). Similar to [2, 3], at a longer time scale, the transients were best fitted with a sum of an exponential and another function (polynomial or slow exponential with the rate independent of myosin concentration). The dependence of the reaction rate on the myosin concentration was fitted by a straight line, and the second order rate of actomyosin rigor binding was determined from the slope (Figure S2). The rate constant obtained without Ficoll70,  $k_{+6}^{-F} = 1.68 \pm 0.05 \mu\text{M}^{-1}\text{s}^{-1}$ , is in excellent agreement with the previous results for *D. discoideum* myosin [4-6]. With Ficoll70, the rate decreases seven-fold to  $0.23 \pm 0.03 \mu\text{M}^{-1}\text{s}^{-1}$ .

Ficoll70 increases the effective concentration of solutes and therefore affects the ionic strength of the solution. Actomyosin interaction depends on the ionic strength [7], and the decreased rate of the actomyosin interaction may reflect the increased ionic strength of the solution. Assuming the activity coefficient  $\gamma = 2.5$  [8], the ionic strength of our buffered solution changes from 59 mM (50 mM KCl, 3 mM MgCl<sub>2</sub>) to 147.5 mM with addition of Ficoll70. We measured the dependence of the reaction rate on the ionic strength, and fitted the experimental data with the Debye-Hückel equation,  $k_{+6} = \exp(A-B \cdot [I]^{0.5})$ , where  $I$  is the ionic strength, and  $A$  and  $B$  are fitting parameters (Figure S3). We found  $A = 1.16$ ,  $B = 4.38 \text{ M}^{-0.5}$ , and  $k_{+6}^{I=147.5\text{mM}} = 0.6 \mu\text{M}^{-1}\text{s}^{-1}$ . At  $I = 147.5 \text{ mM}$ , the second order rate constant,  $k_{+6}$  is 2.8 times smaller than at the ionic strength of 59 mM. We conclude that the increased ionic strength alone does not explain the observed decrease in the rate of actin and myosin association in the crowded solution.

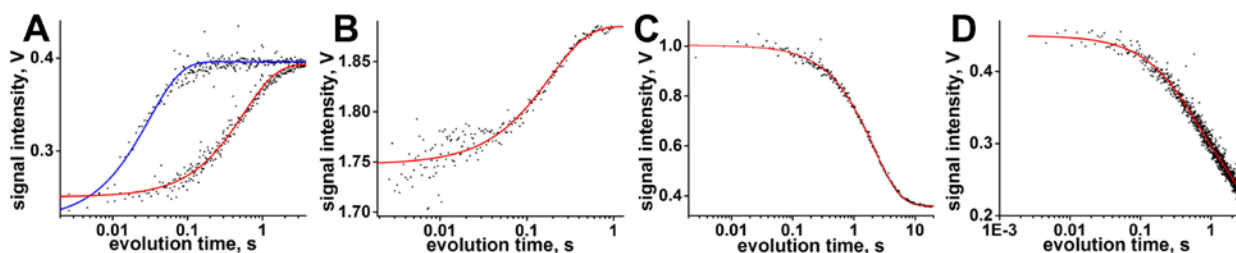

**Figure S 1.** (A) Transients of ATP-induced pyrene actomyosin dissociation, without (blue) and with (red) 37  $\mu\text{M}$  ADP in solution. [actomyosin]=0.5  $\mu\text{M}$ , [ATP]=25  $\mu\text{M}$ . The lines represent single-exponential fits. The obtained rates are  $32.8 \pm 1.0 \text{ s}^{-1}$  and  $1.77 \pm 0.04 \text{ s}^{-1}$ , respectively.

(B) Intrinsic fluorescence transient after rapid mixing of 0.5  $\mu\text{M}$  myosin and 18  $\mu\text{M}$  ATP, step 3, Figure 2. Line, a single-exponential fit.

(C) Transient of the weak to strong binding transition of actomyosin (step 4, Figure 2) in a double mixing experiment. 3  $\mu\text{M}$  myosin, prepared in the post-recovery  $M^{**}$  state by rapid mixing with 100  $\mu\text{M}$  ATP and following incubation of the reaction mixture for 2 s, rapidly mixed with 0.3  $\mu\text{M}$  actin and 1 mM ADP to quench the reaction. Decrease of pyrene fluorescence shows kinetics of the strongly bound state formation. Line, a single-exponential fit.

(D) Transient of actomyosin rigor binding. 0.15  $\mu\text{M}$  pyrene actin rapidly mixed with 0.9  $\mu\text{M}$  myosin. Decrease of pyrene fluorescence shows the kinetics of the strongly bound state formation. Line, a single-exponential fit.

## Electron paramagnetic resonance.

The frozen solution ( $T=15$  K) field sweep spectrum of spin-labeled myosin (Figure S4) was acquired on the  $K_a$ -band pulsed EPR spectrometer at the University of Arizona [9], using a two-pulse electron spin echo technique. The experimental conditions were as follows: the mw pulses, 10 and 15 ns; time interval between the mw pulses,  $\tau = 200$  ns; boxcar integration gate, 15 ns. 30% w/v glycerol was added to the protein sample as a cryoprotectant. The low temperature powder spectrum was simulated to determine the principal values of the spin probe  $g$ - and hyperfine tensors [10], using a Monte-Carlo fitting routine implemented in Wolfram Mathematica 9 (Wolfram Research Inc, Champaign, IL). The room temperature ( $T \approx 20^\circ\text{C}$ ) EPR spectra (Figure S5, Figure S6) were acquired with the X-band continuous wave EPR spectrometer Elexsys E500 (Bruker) at the EPR Facility of the University of Arizona. The experimental conditions were as follows: microwave frequency, 9.6 GHz; microwave power, 200  $\mu\text{W}$ ; modulation frequency, 100 kHz; modulation amplitude, 0.05 mT). Room temperature spectra of spin labeled F-actin and myosin with and without Ficoll70 were fitted using the magnetic tensors determined from the low-temperature spectrum fit using the NLSL software [11] in the model of microscopic order - macroscopic disorder (MOMD) [12], allowing the determination of the restrictions to the spin probe motion.

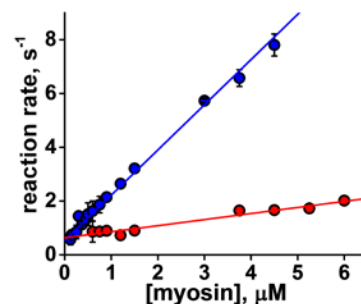

**Figure S 2** The effect of Ficoll70 on actomyosin rigor binding kinetics. Linear fits. Blue, no Ficoll70,  $k_{+6}^F = 1.68 \pm 0.05 \mu\text{M}^{-1}\text{s}^{-1}$ ,  $N=6$ . Red, with Ficoll70,  $k_{+6}^{+F} = 0.23 \pm 0.03 \mu\text{M}^{-1}\text{s}^{-1}$ ,  $N=3$ .

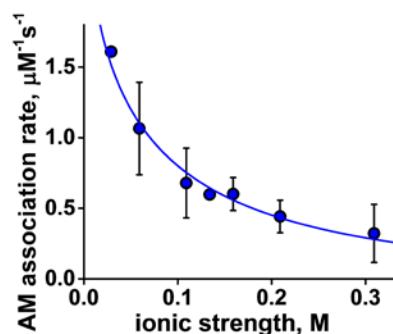

**Figure S 3.** Dependence of the rate of actomyosin rigor binding on the ionic strength of the solution.  $N=3$ . Fit to the equation  $k = \exp(1.16 - 4.38 M^{0.5} \cdot [I]^{0.5})$ .

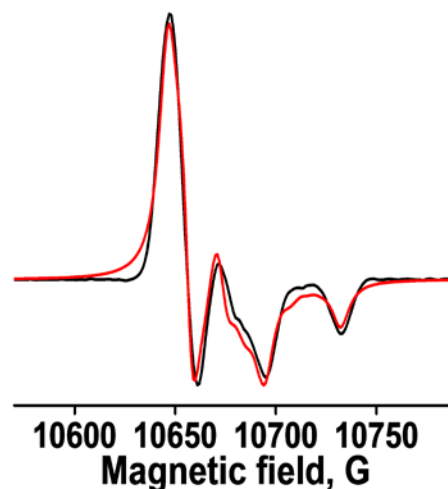

**Figure S 4.**  $K_a$ -band EPR spectrum of the maleimide TEMPO spin labeled myosin at  $T=15$  K. Black, experiment, red, fit in the model of the powder spectrum to determine the magnetic tensors of the spin probe,  $g(2.00894, 2.00578, 2.00179)$ , and  $A(6.07$  G,  $7.94$  G,  $37.52$  G).

### Actin structure is not affected by Ficoll70.

EPR of a nitroxide spin probe is a very sensitive method for characterizing structural changes in proteins [13, 14]. When a spin probe, bound to a protein, is located in the cleft between the protein subdomains, it is a good reporter on the subdomain reorganization. In actin, the labeling site C374 is located between subdomains 1 and 3, and an EPR study of spin-labeled actin can detect the possible structural effect of Ficoll70 on the relative orientation of the actin subdomains. Therefore, F-actin was labeled with TEMPO maleimide spin probe at C374 to

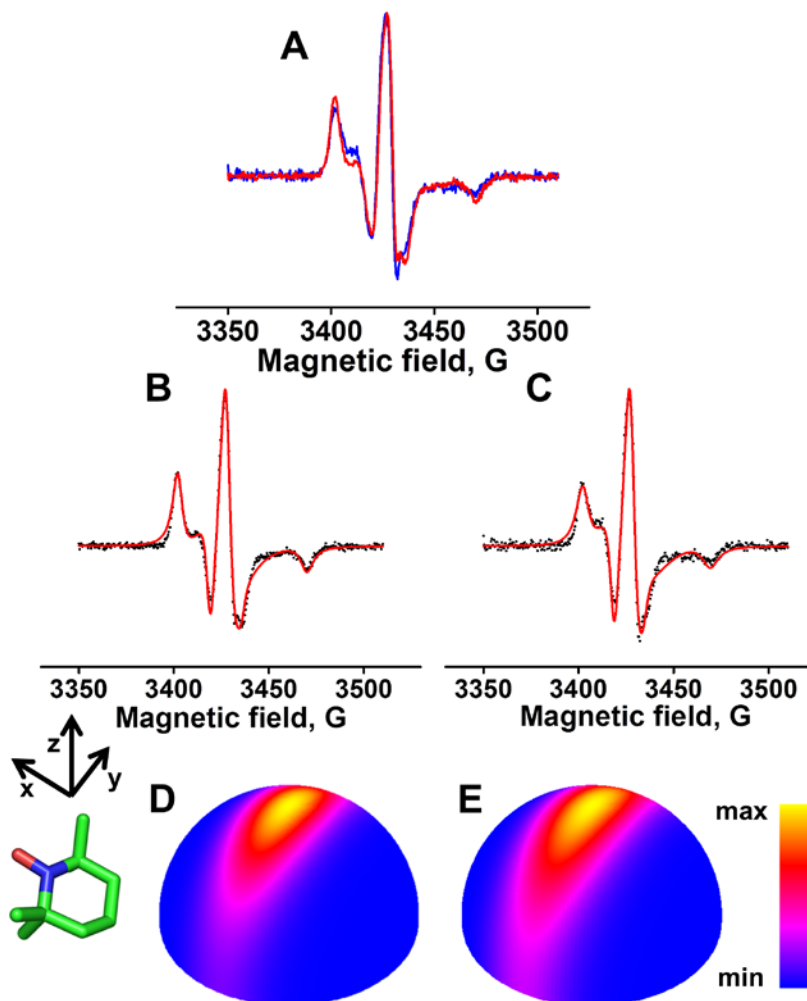

**Figure S 5.** A. X-band EPR spectra of the maleimide TEMPO spin probe at actin's C374, without (blue) and with (red) Ficoll70 in solution. C374 is located between actin's sub-domains 1 and 3, and the spin probe reflects Ficoll70-induced changes in actin structure. The magnitude of the outer extrema splitting is not affected by Ficoll70, indicating no change in the probe's mobility about its z axis. The minor changes in the inner splittings indicate slight differences in the probe's motion about x or y axes.

B,C, the fits of X-band spectra to determine the orientational distribution of the spin probe within actin's C374 labeling site, with (B) and without (C) Ficoll70 in solution. D and E, the orientational distributions of the spin probe with (D) and without (E) Ficoll70 in solution, based on the fits of the EPR spectra in the MOMD model. The probability of orientational distribution of z axis of the probe (perpendicular to the piperidine ring plane) is color-coded. With Ficoll70 in solution, the probe mobility about its x axis is slightly decreased.

determine if there are any changes in the probe's local structural environment when Ficoll70 is added to the solution. The X-band EPR spectra of spin-labeled F-actin with and without Ficoll70 are shown in Figure S5A. The simulations of X-band EPR spectra in the MOMD model (Figure S5, B and C) reveal highly anisotropic motion of the spin probe relative to actin molecular frame with the average correlation time of 33 ns. The order parameters [11] are  $D_{20} = 0.65$  and  $D_{22} = -0.22$  with Ficoll70, and  $D_{20} = 0.56$  and  $D_{22} = -0.28$  without Ficoll70; the probability of the orientational distribution of the spin probe within the actin monomer molecular frame is shown in Figure S5, D and E. Both spectral fits show the spin probe motion (rotational oscillations) mostly about its x-axis. There is a minor difference in the spin probe's restricted motion with and without Ficoll70: with Ficoll70 in solution, the oscillations about the x-axis have slightly smaller amplitude. In general, the spin probe has the same character of motion with and without Ficoll70, confirming that there is virtually no effect on the structure of F-actin in the presence of Ficoll70.

### TR<sup>2</sup>FRET data analysis.

In the TR<sup>2</sup>FRET experiment, we observe the waveforms of the fluorescence of donor-acceptor labeled myosin in two structural states, M\* and M\*\*, and the fluorescence of donor-only labeled myosin. The acceptor (Dabcyl) is not fluorescent, and we do not expect to detect fluorescence from the acceptor. Therefore, the waveform of observed transient fluorescence at each time point is fitted as a sum of three components, convoluted with the instrument response function (determined from the light scatter).

The parameters of donor fluorescence are determined in a separate experiment with donor-only labeled myosin, using Eq. S1:

$$F_D(t) = \sum_{i=1}^2 A_i \exp(-t/\tau_{Di}), \quad \text{Eq. S1}$$

where  $\tau_{Di}$  are the donor-only fluorescence lifetimes.

The interprobe distance and distance distribution  $\rho(r)$  in the M\* state are determined in the experiment with donor-acceptor labeled myosin without ATP, using Eq. S2. The donor fluorescence parameters determined in the previous experiment were kept fixed.

$$F_{DA}(t) = \int_0^{+\infty} \rho(r) \cdot \sum_{i=1}^2 A_i \exp\left\{\left(-\frac{t}{\tau_{Di}}\right) \cdot \left(1 + \left[\frac{R_0}{R}\right]^6\right)\right\} dr, \quad \text{Eq. S2}$$

where  $R_0 = 4$  nm is the Förster distance for IAEDANS-Dabcyl pair [15] and  $\rho(r)$  is a probability density function to account for the interprobe distance distribution. We used a Gaussian distribution as a probability density function:

$$\rho(r) = \frac{1}{\sigma\sqrt{2\pi}} \exp\left(-\frac{(r-R)^2}{2\sigma^2}\right), \quad \text{Eq. S3}$$

where  $\sigma$  is the standard deviation, determining the interprobe distance distribution, and  $R$  is the position of the distribution maximum.

The mole fraction of the M\*\* state, and the corresponding interprobe distance and distance distribution are determined from the experiment where myosin is rapidly mixed with ATP. Experimental data are fitted by Eq. S4, with all previously determined parameters fixed.

$$F_{total}(t) = X \cdot F_D(t) + X^* \cdot F_{DA^*}(t) + X^{**} \cdot F_{DA^{**}}(t), \quad X + X^* + X^{**} = I, \quad \text{Eq. S4}$$

In this equation,  $X$  without and with superscripts are the mole fractions of donor-donor labeled myosin ( $X$ ), and donor-acceptor labeled myosin in M\* and M\*\* structural states.

To account for Ficoll70 photobleaching, we collected the waveforms of Ficoll70 fluorescence at the same wavelength and intensity of the excitation light, and the same spectral range and voltage of the detector as in the experiments with myosin. The obtained waveforms of Ficoll70 fluorescence were fitted with single-exponential functions with a constant decay time constant convoluted with the instrument response function. Intensities of Ficoll70 fluorescence waveforms were fitted by a polynomial (Figure S9), and this completely characterized Ficoll70 fluorescence signal was accounted for in the global fit of the FRET effect of the donor-acceptor pair within myosin head.

Analysis of transient time-resolved fluorescence data was performed using software package FargoFit, designed by I. Negrashov, that executes global least-square fitting of multiple time-resolved fluorescence waveforms using different kinetic models with ability to link fitting parameters between waveforms.

### **Förster distance calculation.**

The Förster distance,  $R_0$ , was calculated as

$$R_0 = 9786[J(\lambda)\kappa^2\eta^{-4}Q_D]^{1/6}, \quad \text{Eq. S5}$$

where  $\lambda$  is the wavelength,  $J(\lambda)$  is the spectral overlap integral between normalized donor emission spectrum  $F_D(\lambda)$  and the acceptor absorption spectrum  $\varepsilon_A(\lambda)$  [15],  $\kappa^2 = 2/3$  is the probes orientation factor,  $\eta = 1.4$  is the refraction index of the medium,  $Q_D$  is the donor quantum yield [15]. To ensure that the  $R_0$  does not change upon Ficoll70 addition to the solvent we checked the spectra of donor emission and acceptor absorption, and compared the level of donor fluorescence in the presence and absence of Ficoll70. Fluorescence of Ficoll70 was subtracted from the donor fluorescence. Donor and acceptor spectra were the same with and without Ficoll70 [15], therefore the spectral overlap integral is not affected by Ficoll70 addition. The magnitude of the donor fluorescence was the same with and without Ficoll70, therefore the donor quantum yield was not disturbed by addition of Ficoll70. The index of refraction of the solution changes marginally (3%) with addition of 25% w/v Ficoll70 [16], this change of the index virtually does not affect  $R_0$ . The  $\kappa^2$  factor determines averaged relative orientation of the donor and acceptor and the average value of  $\kappa^2 = 2/3$  corresponds to the model of donor and acceptor probes independently sampling all possible orientations. We used EPR to examine if addition of Ficoll70 affects the probability of orientational distribution of a probe at the myosin labeling site. Single Cys myosin mutant K498C was labeled with the maleimide TEMPO spin probe and X-band EPR spectra were acquired for spin labeled myosin in buffered solution with and without 25% w/v Ficoll70 (Figure S6). The spectra show virtually no change in the probe mobility with addition of Ficoll70 to the solution, indicating no major effect of Ficoll70 on the factor  $\kappa^2$ . Therefore we conclude that  $R_0$  does not change with addition of Ficoll70 to the buffer.

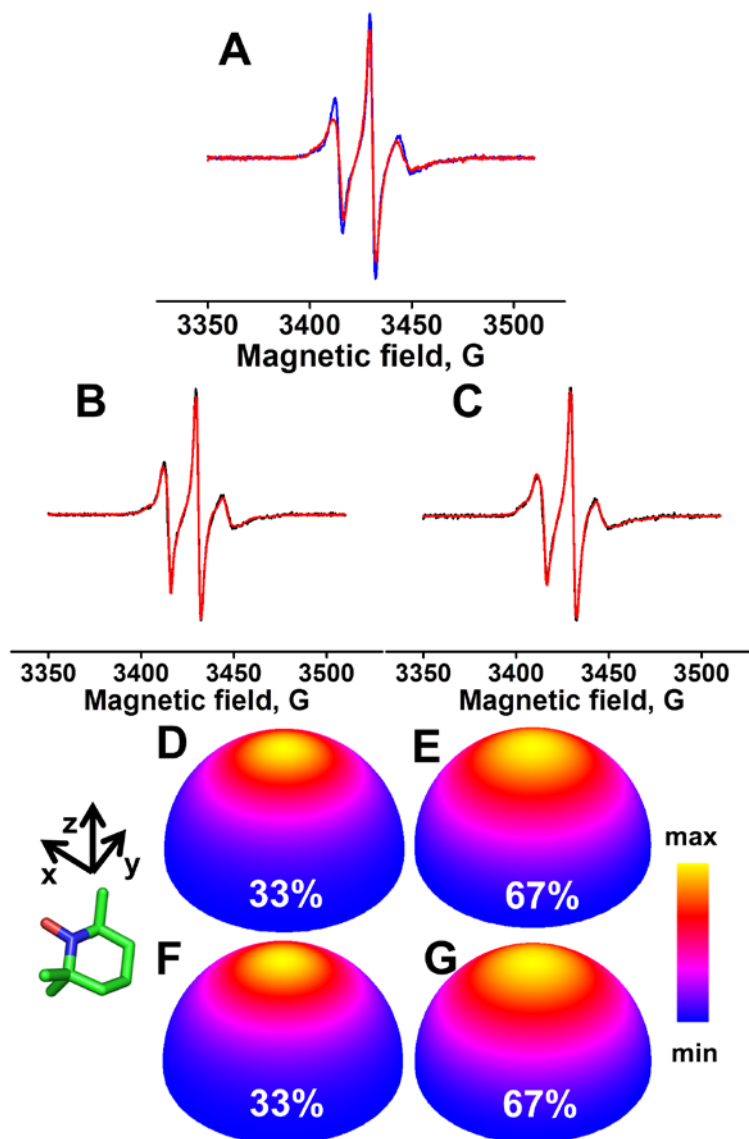

**Figure S 6.** A. X-band EPR spectra of myosin labeled at K498C with maleimide TEMPO spin probe, without (blue) and with (red) Ficoll70 in solution. Both spectra show two conformations of the spin probe with the distinct slow (restricted) and fast (less restricted) motion. B, C. The fit of both spectra using MOMD model, B, without Ficoll70; C, with Ficoll70. D-G. Spin probe orientational distribution in the myosin molecular frame obtained from the fits. The fits show that the spectral components corresponding to the slow and restricted motion of the spin probe (33% of total spin probe population, D, without Ficoll70, and F, with Ficoll70) are not affected by Ficoll70. The correlation time of the spin probe motion is 27.5 ns and the isotropic order parameter is  $D_{20} = 0.53$ . The order parameter of the spectral components, corresponding to the fast (correlation time 7.9 ns) and less restricted motion (E, without Ficoll70, and G, with Ficoll70) depends on the presence of Ficoll70 in solution, the isotropic order parameter  $D_{20}$  changes from  $D_{20} = 0.19$  without Ficoll70 (E), to  $D_{20} = 0.22$  with Ficoll70 (G). X-band EPR spectra reflect global tumbling of myosin molecule [14] and such small increase of the order parameter with addition of Ficoll70 may reflect the viscosity change. The orientational distribution of z axis of the probe (perpendicular to the piperidine ring plane) is color-coded.

### Steady state ATPase assays.

Concentration of ATP in both basal and actin activated myosin ATPase was 5 mM, myosin concentration was 3.3  $\mu\text{M}$  in the basal and 0.84  $\mu\text{M}$  in the actin activated myosin ATPase. From 4.2  $\mu\text{M}$  to 84  $\mu\text{M}$  actin (5x – 100x) was used in the actin activated ATPase. At the time point zero myosin or actomyosin was mixed with ATP, and aliquots were collected at equal time intervals. The solution was incubated at  $T = 20^\circ\text{C}$ . After collection, the aliquots were immediately mixed with the malachite green – ammonium molybdate solution (0.06% malachite green carbinol hydrochloride, 15 mM ammonium molybdate tetrahydrate in 1N HCl, with 4% of 1% Sterox detergent, added immediately before use), the mixture was quenched with 34% sodium citrate in 1N HCl after 30 seconds of color development. Then the aliquots were incubated 20 minutes at room temperature before measurement of optical density

at 620 nm. To interpret results of optical density measurement at 620 nm in terms of phosphate concentration, a calibration curve was measured using the same colorimetric assay with premixed phosphate solutions of known concentration. The typical time dependence of actin activated myosin ATPase is shown in Figure S7. Obtained data of optical density were fitted with the straight lines, to determine the rate of color development in the course of ATPase, then the rates were recalculated in terms of concentration of the phosphate produced in the reaction, using the calibration curve. Normalization on the amount of myosin in the assay gives the rate of the phosphate production per myosin head. Straight lines in Figure S7 confirm that the presence of ADP, produced in the reaction, does not perturb the reaction. 5 mM ATP is clearly a saturating concentration, and the velocity of the reaction is not affected by ADP contamination [17].

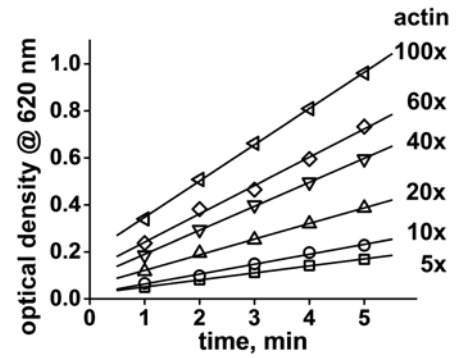

**Figure S 7.** Typical time dependence of the actin activated myosin ATPase at different actin concentrations. [Myosin] = 0.84  $\mu\text{M}$ , [ATP] = 5 mM. The sensitivity of the assay is 3.5  $\mu\text{M}$  phosphate in solution. Linear fits confirm that 5 mM ATP is truly saturating concentration and the production of ADP in the course of the reaction does not affect the  $V_{\text{max}}$ .

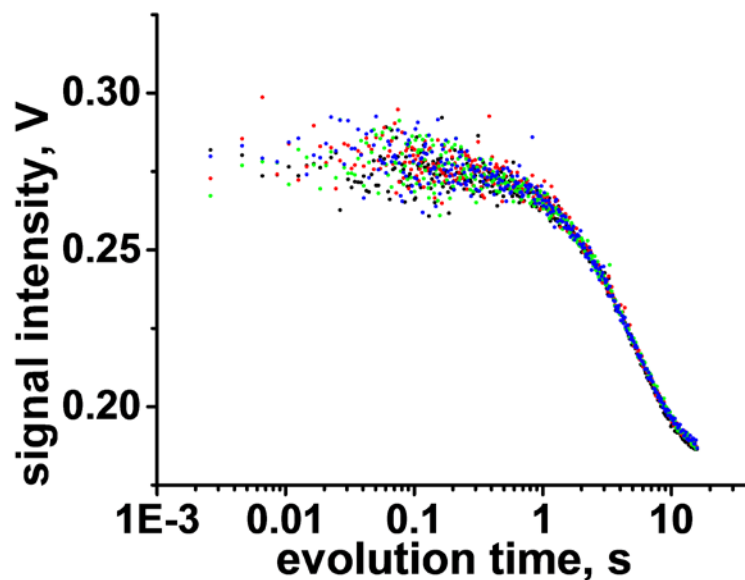

**Figure S 8.** Calibration of the delay time in the weak to strong actomyosin binding transition experiment. The decrease of pyrene actin fluorescence reflects the strong actomyosin binding. Double mixing experiment: in the first rapid mixing of myosin and ATP, myosin is prepared in the post-recovery stroke state  $M^{**}$ . The mixture is aged to maximize  $[M^{**}]$ . Then the initial mixture is rapidly mixed with pyrene actin and ADP. ADP is added to stop actomyosin ATPase activity after formation of the strongly bound state. Overlay of weak to strong binding transients at different delay times: black, 0.7 s; red, 2 s; green, 5 s; blue, 10 s. All transients are similar and show no dependence on the delay time.

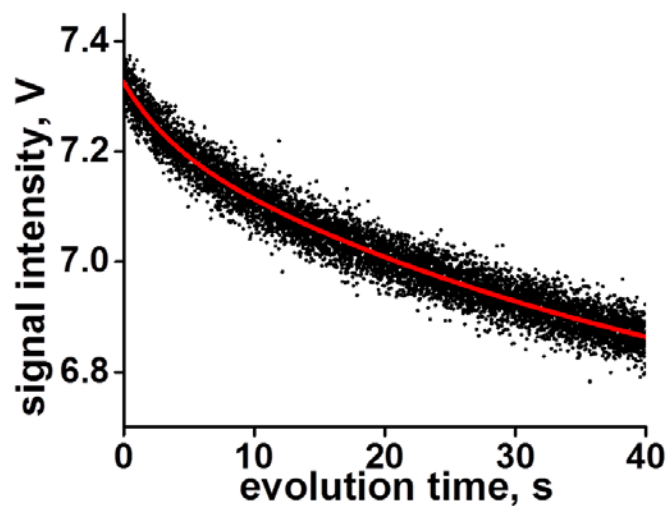

**Figure S 9.** Photobleaching of the 25% w/v Ficoll70 buffered solution. Excitation wavelength 365 nm, the signal is detected using a 420 nm cutoff filter. Red line is a polynomial fit. Ficoll70 photobleaching transient was acquired for each buffer preparation, and the fitted line was subtracted from the raw transients of pyrene labeled actin in actomyosin binding and dissociation experiments. Ficoll70 concentration, flow rate, intensity and the wavelength of the excitation light, the detector voltage and the spectral range of the detected light were kept the same in all experiments.



## Supporting References

1. Criddle, A.H., M.A. Geeves, and T. Jeffries, *The Use of Actin Labeled with N-(1-Pyrenyl)Iodoacetamide to Study the Interaction of Actin with Myosin Subfragments and Troponin Tropomyosin*. *Biochemical Journal*, 1985. **232**(2): p. 343-349.
2. Deacon, J.C., et al., *Erratum to: Identification of functional differences between recombinant human alpha and beta cardiac myosin motors*. *Cell Mol Life Sci*, 2012. **69**(24): p. 4239-55.
3. Woodward, S.K.A., M.A. Geeves, and D.J. Manstein, *Kinetic characterization of the catalytic domain of Dictyostelium discoideum myosin*. *Biochemistry*, 1995. **34**(49): p. 16056-16064.
4. Gyimesi, M., et al., *Kinetic characterization of the function of myosin loop 4 in the actin-myosin interaction*. *Biochemistry*, 2008. **47**(1): p. 283-91.
5. Kurzawa, S.E., D.J. Manstein, and M.A. Geeves, *Dictyostelium discoideum myosin II: characterization of functional myosin motor fragments*. *Biochemistry*, 1997. **36**(2): p. 317-23.
6. Liu, X., et al., *Biological, biochemical, and kinetic effects of mutations of the cardiomyopathy loop of Dictyostelium myosin II: importance of ALA400*. *J Biol Chem*, 2005. **280**(29): p. 26974-83.
7. Siemankowski, R.F. and H.D. White, *Kinetics of the interaction between actin, ADP, and cardiac myosin-S1*. *J Biol Chem*, 1984. **259**(8): p. 5045-53.
8. Wenner, J.R. and V.A. Bloomfield, *Crowding effects on EcoRV kinetics and binding*. *Biophys J*, 1999. **77**(6): p. 3234-41.
9. Astashkin, A.V., J.H. Enemark, and A.M. Raitsimring, *26.5–40 GHz Ka-band pulsed EPR spectrometer*. *Concepts in Magnetic Resonance Part B: Magnetic Resonance Engineering*, 2006. **29B**: p. 125-136.
10. Libertini, L. and O. Griffith, *Orientation dependence of the electron spin resonance spectrum of di-t-butyl nitroxide*. *J Chem Phys*, 1970. **53**: p. 1359-1367.
11. Budil, D., et al., *Nonlinear-least-squares analysis of slow-motion EPR spectra in one and two dimensions using a modified Levenberg-Marquardt algorithm*. *J Magn Reson*, 1996. **A120**: p. 155-189.
12. Schneider, D.J. and J.H. Freed, *Calculating slow motional magnetic resonance spectra: a user's guide*, in *Biological Magnetic Resonance*, L.J. Berliner, Editor. 1989, Plenum Publishing Corporation. p. 1-76.
13. Nesmelov, Y.E., *Protein structural dynamics revealed by site-directed spin labeling and multifrequency EPR*. *Methods Mol Biol*, 2014. **1084**: p. 63-79.
14. Nesmelov, Y.E., et al., *Structure and dynamics of the force-generating domain of myosin probed by multifrequency electron paramagnetic resonance*. *Biophys J*, 2008. **95**(1): p. 247-56.
15. Agafonov, R.V., et al., *Structural dynamics of the myosin relay helix by time-resolved EPR and FRET*. *Proc Natl Acad Sci U S A*, 2009. **106**(51): p. 21625-30.
16. Georgalis, Y., et al., *Light scattering studies on Ficoll PM70 solutions reveal two distinct diffusive modes*. *Journal of Colloid and Interface Science*, 2012. **386**: p. 141-147.
17. Segel, I.H., *Biochemical Calculations*. 1976: Wiley.
